# Supplementary material for: Reduced somatostatin signalling leads to hypersecretion of glucagon in mice fed a high-fat diet
Source: PubMed Central journal article supplement (PMC7322681; doi:10.1016/j.molmet.2020.101021), 2020-05-21

# Supplementary Figure 1

a

CTL

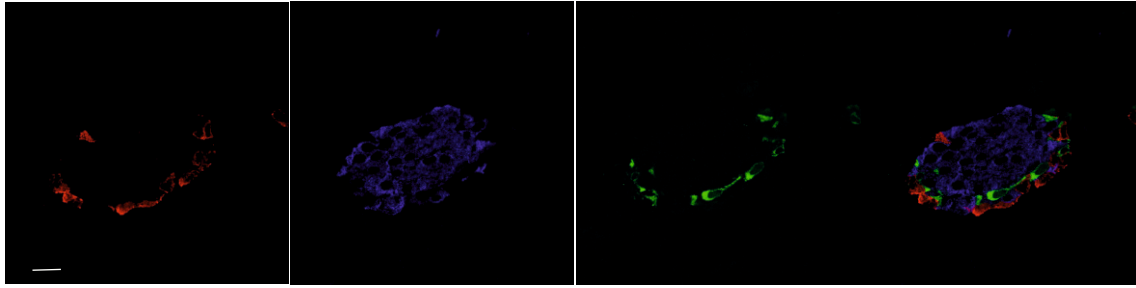

HFD

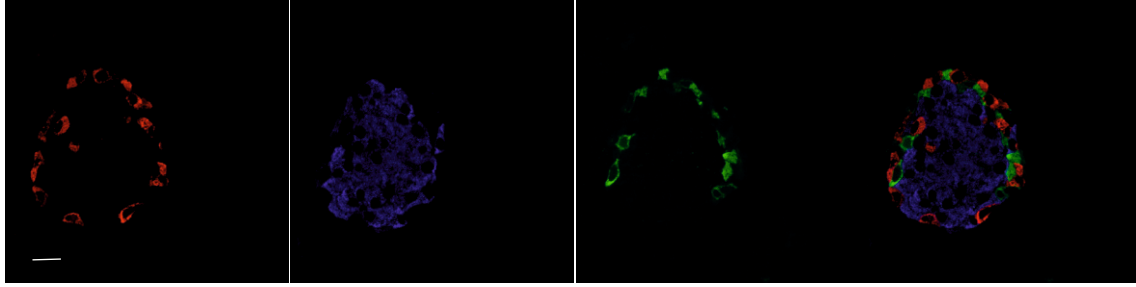

Glucagon

Insulin

Somatostatin

overlay

b

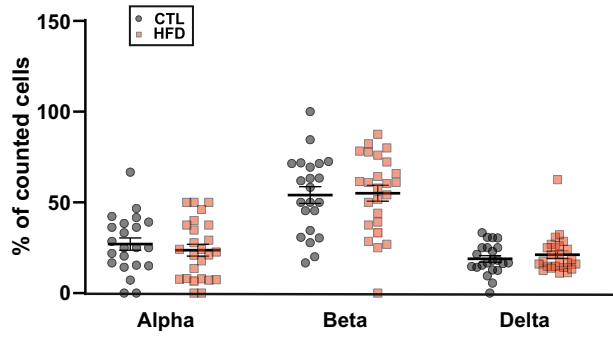

C

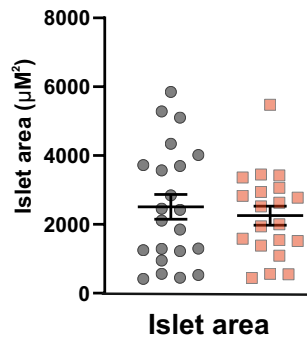

Supplement: mmc1.pdf [file mmc1.pdf]
